# Supplementary material
Source: bioRxiv or medRxiv preprint supplement (https://medrxiv.org/highwire/filestream/88237/field_highwire_adjunct_files/0/2020.07.01.20144691-1.pdf)
Supplement: Supplementary file [file 2020.07.01.20144691-1.pdf]

**Table S1. Suspected respiratory illness criteria.**

|                                                                                                                                                                                                                                                                                                                                                                                              |
|----------------------------------------------------------------------------------------------------------------------------------------------------------------------------------------------------------------------------------------------------------------------------------------------------------------------------------------------------------------------------------------------|
| Respiratory illness is defined as any mention of the following words or combinations of words in the chief complaint field*:                                                                                                                                                                                                                                                                 |
| <ul style="list-style-type: none"><li>• Bronchitis</li><li>• Pneumonia (and common misspellings)</li><li>• Shortness of breath AND Fever/Febrile</li><li>• Shortness of breath AND Cough/Croup</li><li>• Wheezing</li><li>• Respiratory</li><li>• Fever (including temperature, fever, febrile)</li><li>• Cough/Croup AND Fever/Febrile</li><li>• COVID-19</li><li>• Influenza/Flu</li></ul> |
| To ensure we do not categorize events as respiratory that have similar spellings/mentions of these words in the chief complaint field, we exclude the following:                                                                                                                                                                                                                             |
| <ul style="list-style-type: none"><li>• Tempo, Templ, Tempt, Attemp, Low, Dec, Temporal</li><li>• Aspiration</li><li>• Fluid, flutter, reflux, flush, fluctuating, hydrofluoric, foreign body</li><li>• Stomach, vomit, diarrhea, nausea, abd, bili, inability, bladder, whoop, UTI, urinary, urin, sepsis, facility, shot, immuniz, ear, eye, allerg, abscess</li></ul>                     |
| *Symptoms that may be associated with a respiratory cause (e.g. COVID-19, influenza-like illnesses, or other respiratory diseases), but could have other etiologies, such as shortness of breath, were only considered respiratory if the chief complaint additionally mentioned fever or cough.                                                                                             |

**Table S2.** Temporal trends in ED visits within each time period between 2018 through 2020 in Marin County, California.

|                                  | Time Periods |          |           |            |                |
|----------------------------------|--------------|----------|-----------|------------|----------------|
|                                  | Jan 1-Mar 2  | Mar 3-16 | Mar 17-31 | April 1-14 | April 15-May 4 |
| ED visits, trend <sup>†</sup>    |              |          |           |            |                |
| 2018                             | -0.15        | -0.29    | 0.57*     | -0.13      | 0.04           |
| 2019                             | 0.07         | 0.31     | -0.04     | -0.49*     | 0.48*          |
| 2020                             | -0.10        | -0.51*   | -0.61*    | 0.09       | 0.47*          |
| Respiratory ED visits, trend     |              |          |           |            |                |
| 2018                             | -0.33*       | -0.29    | 0.22      | -0.05      | -0.17          |
| 2019                             | 0.09         | 0.08     | -0.20     | -0.20      | 0.38*          |
| 2020                             | 0.11         | 0.00     | -0.47*    | -0.54*     | 0.14           |
| Non-respiratory ED visits, trend |              |          |           |            |                |
| 2018                             | -0.09        | -0.27    | 0.54*     | -0.04      | 0.10           |
| 2019                             | 0.06         | 0.31     | 0.09      | -0.48*     | 0.46*          |
| 2020                             | -0.12        | -0.54*   | -0.52*    | 0.15       | 0.45*          |

\*p<0.05

<sup>†</sup>Values indicate tau coefficients from Mann-Kendall test for trend analysis.
